# Supplementary material for: Technical Outcome, Clinical Success, and Complications of Low-Milliampere Computed Tomography Fluoroscopy-Guided Drainage of Lymphoceles Following Radical Prostatectomy with Pelvic Lymph Node Dissection
Source: MDPI journal article supplement (doi:10.3390/diagnostics12102394), 2022-10-01
Supplement: s1 [file s1]

**Supplementary Table S1:** Parameters of the generalized linear mixed models (GLMM) used in Figure 4 and 5.

| C-reactive Protein |                 |            |        | Leukocyte Count |            |        |
|--------------------|-----------------|------------|--------|-----------------|------------|--------|
| Predictors         | Estimates       | CI         | p      | Estimates       | CI         | P      |
| (Intercept)        | 0.72            | 0.51–0.93  | <0.001 | 0.94            | 0.89–0.98  | <0.001 |
| timepoint day      | -0.04           | -0.04–0.03 | <0.001 | -0.01           | -0.01–0.01 | <0.001 |
| Random Effects     |                 |            |        |                 |            |        |
| σ²                 | 0.12            |            |        | 0.01            |            |        |
| τ00                | 0.30            | Subject ID |        | 0.01            | Subject ID |        |
| ICC                | 0.72            |            |        | 0.48            |            |        |
| N                  | 31              | Subject ID |        | 32              | Subject ID |        |
| Observations       | 164             |            |        | 167             |            |        |
| Marginal R²        | / 0.135 / 0.754 |            |        | 0.126 / 0.548   |            |        |
| Conditional R²     |                 |            |        |                 |            |        |

CI: Confidence Interval;  $R^2$ : Coefficient of Determination;  $\sigma^2$ : distribution-specific variance;  $\tau_{00}$ : between-subject-variance; ICC: intraclass correlation coefficient, N: number of subjects
